# Supplementary material
Source: PubMed Central journal article supplement (PMC4020795)
Supplement: halms630672-supplement_3.pdf [file halms630672-supplement_3.pdf]

## Supplemental table1

| <b>Gene</b>                | <b>Forward</b>           | <b>Reverse</b>            |
|----------------------------|--------------------------|---------------------------|
| <i>p16<sup>INK4a</sup></i> | GAGCAGCATGGAGCCTTC       | GGCCTCCGACCGTAACTATT      |
| <i>MR</i>                  | GCAATCCCGGTTCTCATCGC     | CGAGGAAGAGGTTCCGGTTCACC   |
| <i>AMAC1</i>               | AGCTCTGCTGCCTCGTCAT      | CCCCTTCTTATTGGGGTCA       |
| <i>CD163</i>               | TTGCCAGCAGTTAAATGTG      | AGGACAGTGTTTGGGACTGG      |
| <i>IL-10</i>               | TGATGTCTGGGTCTTGGTTC     | GCCTAACATGCTTCGAGATC      |
| <i>TNF</i>                 | GGAAGACCCCTCCCAGATAG     | CAGAGGGCCTGTACCTCATC      |
| <i>COX2</i>                | TGCTTGTCTGGAACAACACTGC   | TGAGCATCTACGGTTTGCTG      |
| <i>IL6</i>                 | TCGGTACATCCTCGACGGCATC   | CATTTGTGGTTGGGTCAGGGGTG   |
| <i>CycloA</i>              | GCATACGGGTCCTGGCATCTTGTC | ATGGTGATCTTCTTGCTGGTCTTGC |
