# Supplementary material
Source: PubMed Central journal article supplement (PMC4020795)

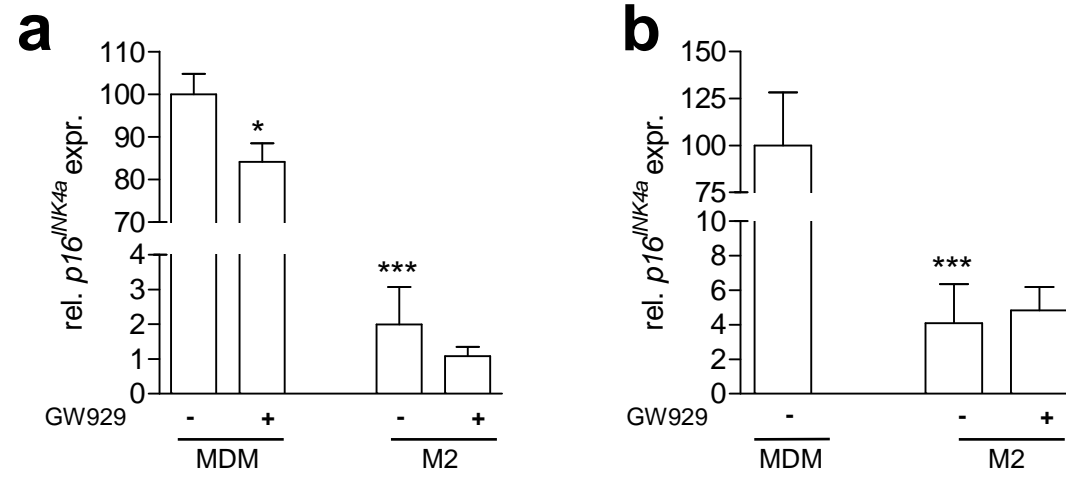

Supplement: halms630672-supplement_1.pdf [file halms630672-supplement_1.pdf]

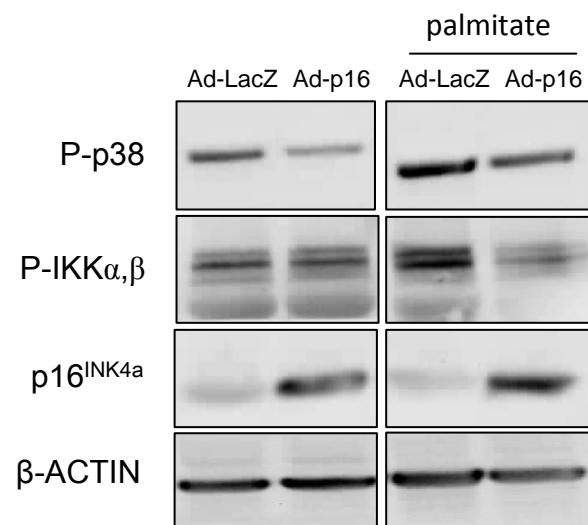

Supplement: halms630672-supplement_2.pdf [file halms630672-supplement_2.pdf]
